# Supplementary material
Source: PubMed Central journal article supplement (PMC6218856)
Supplement: ASN.2018060573SupplementaryData2.pdf [file ASN.2018060573SupplementaryData2.pdf]

## **SIGNIFICANCE STATEMENT**

We previously identified that allograft *SHROOM3* expression, and a CKD-associated intronic *SHROOM3* locus with enhancer function, are associated with subsequent renal allograft fibrosis, whereas tubular *Shroom3* knockdown reduced fibrosis. Although these data suggested potential to target *SHROOM3* as therapy in kidneys carrying the A-allele (risk locus), they contrast with evidence of a protective role for *SHROOM3* in glomerular development. We show here the interesting divergent associations of glomerular and non-glomerular *SHROOM3* expression with CKD, as well as the corresponding dichotomous associations of the enhancer A-allele with eGFR and albuminuria in allografts. In adult glomeruli, *Shroom3* knockdown caused albuminuria without podocyte loss in the short term. *Shroom3* interacted with the Src-kinase FYN *via* SH3-binding site in podocytes, and regulated FYN-activation and downstream phosphorylation of Nephritin, and actin cytoskeletal organization. These current mechanistic data are essential before the design of a therapeutic intervention in humans targeting *SHROOM3* to inhibit renal fibrosis.
